# Supplementary material for: Small volume bone marrow aspirates with high progenitor cell concentrations maximize cell therapy dose manufacture and substantially reduce donor hemoglobin loss
Source: Springer Nature journal article supplement (doi:10.1186/s12916-023-03059-3), 2023-09-19

**Additional file 1: Fig. S1**

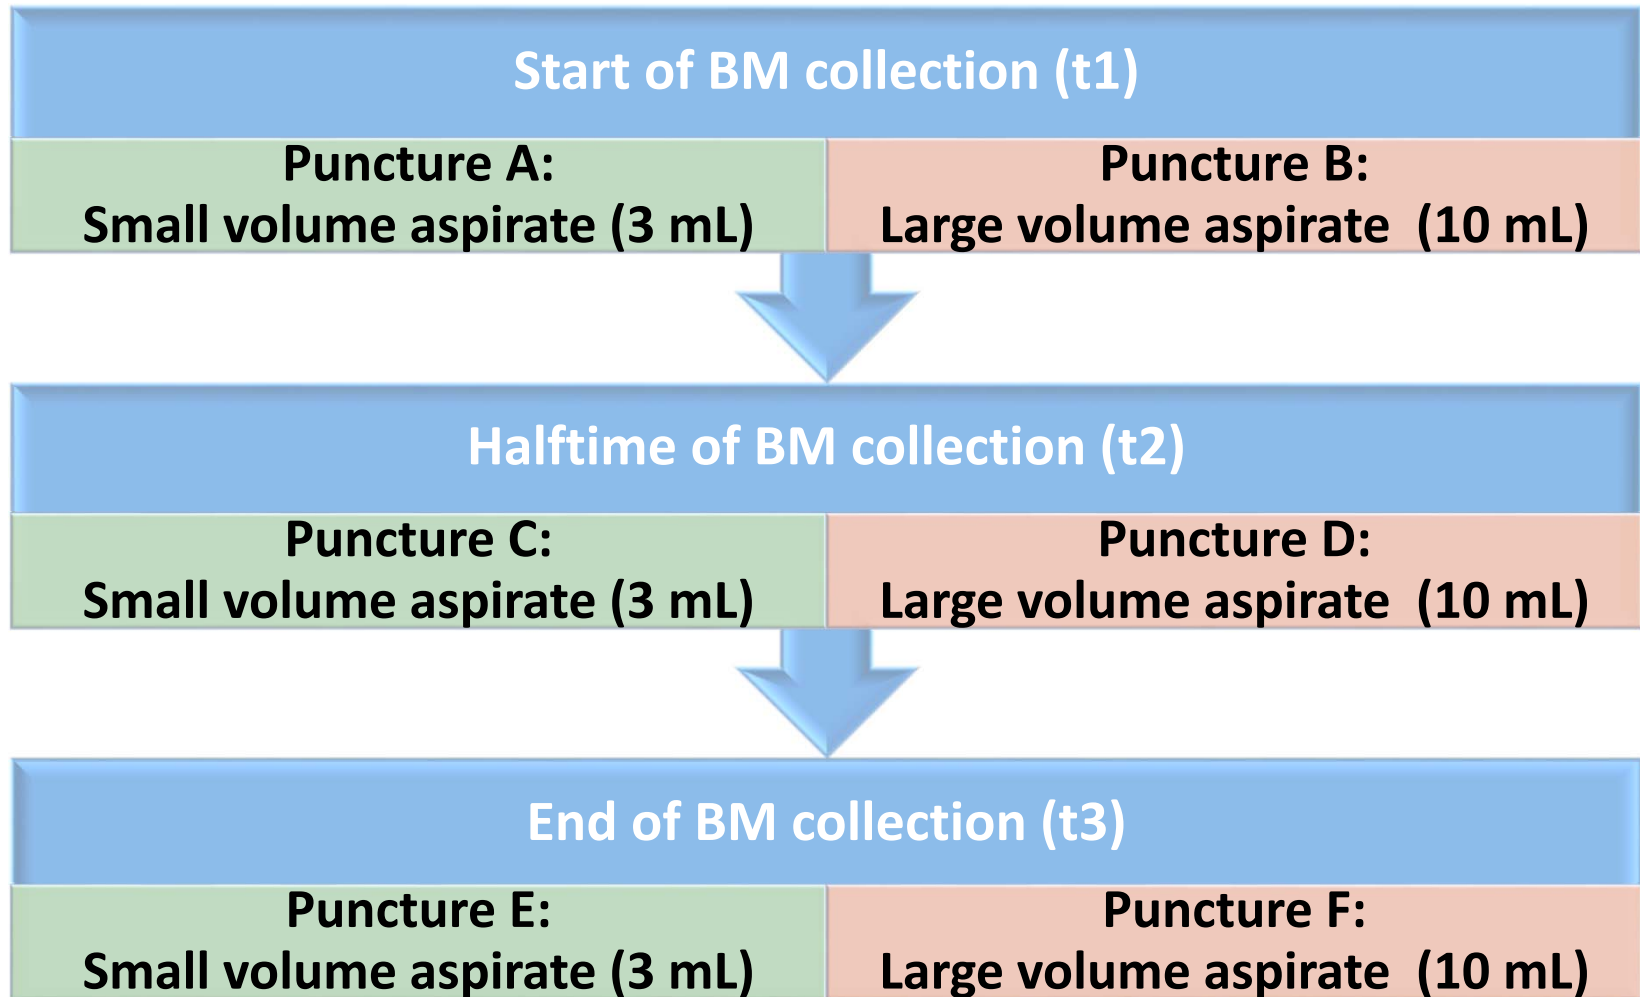

Additional file 1: Fig. S2

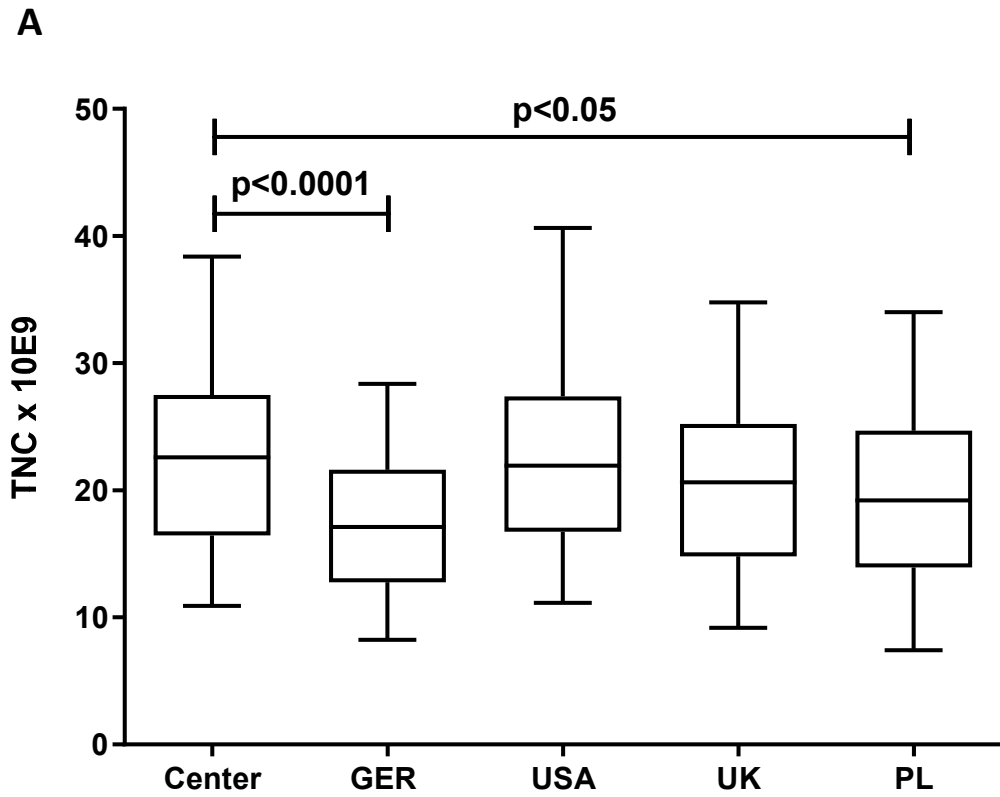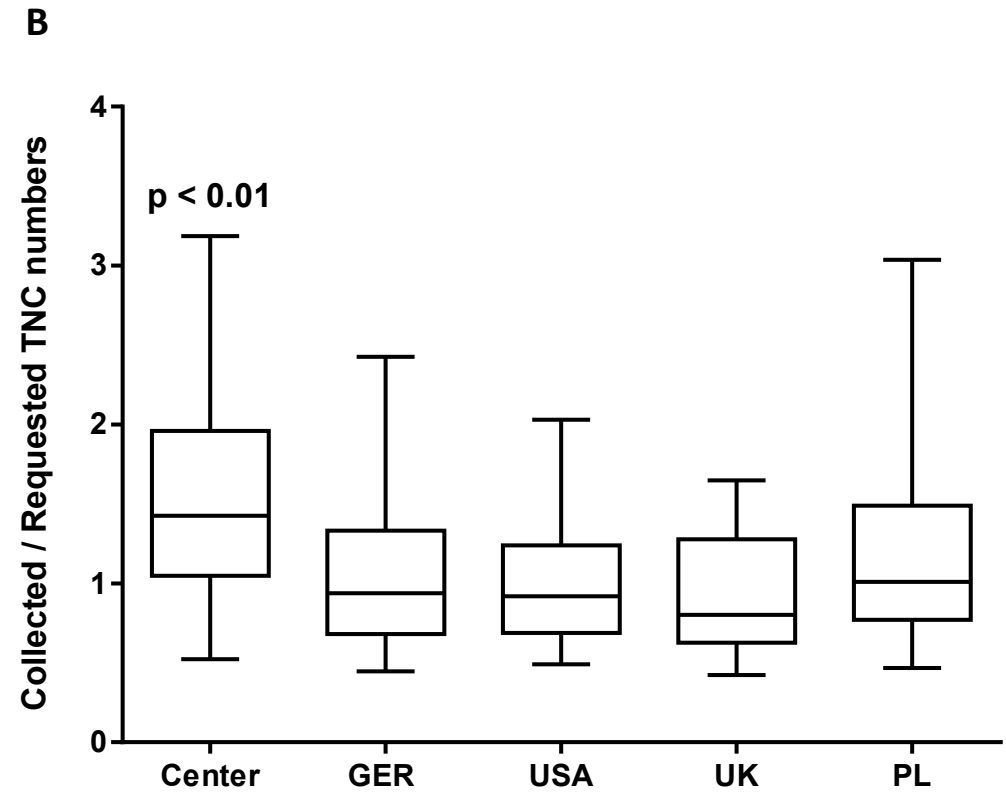

**Additional file 1: Fig. S3**

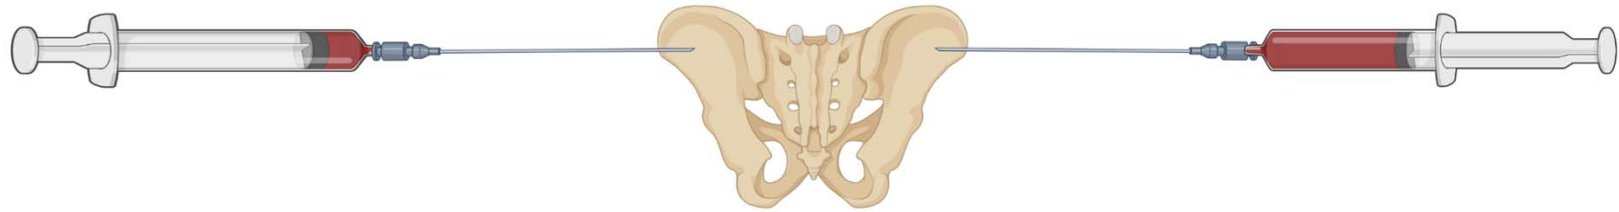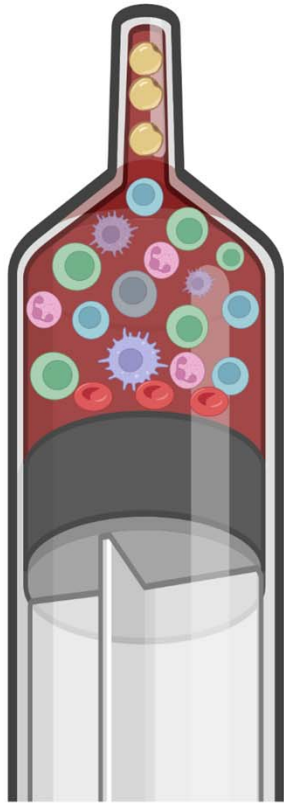

**Small volume  
BM aspirate**

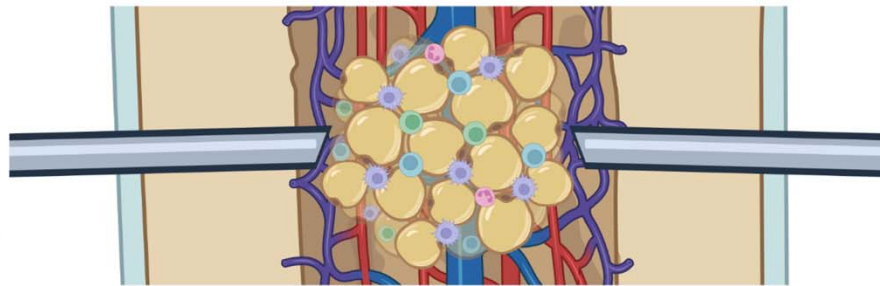

**Large volume  
BM aspirate**

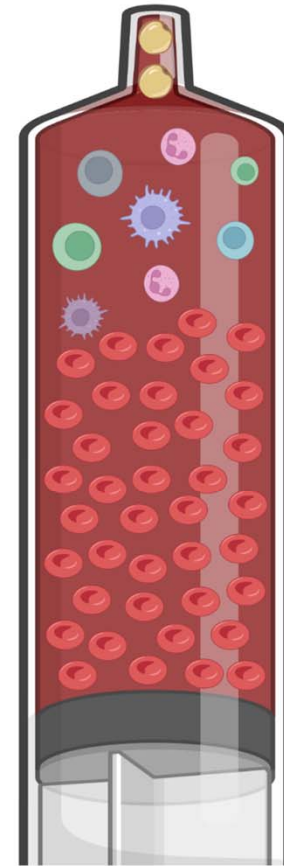

Additional file 1: Fig. S4

**A**

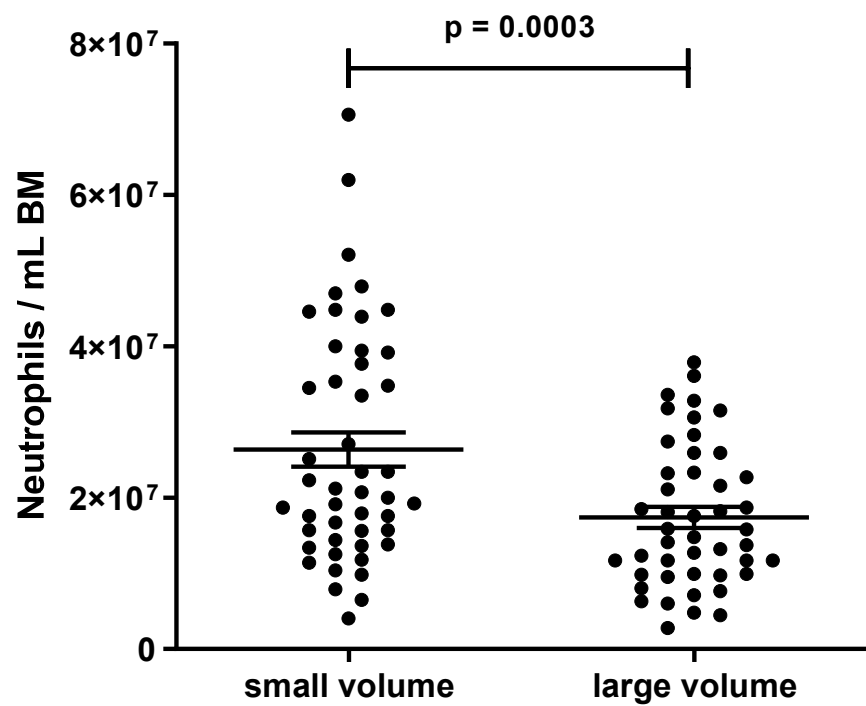

**B**

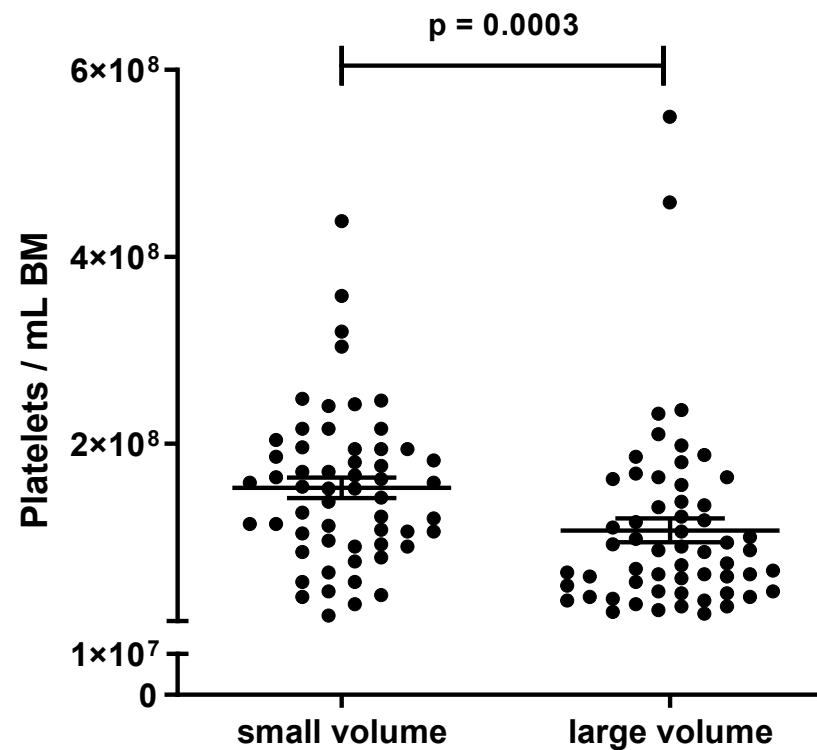

Additional file 1: Fig. S5

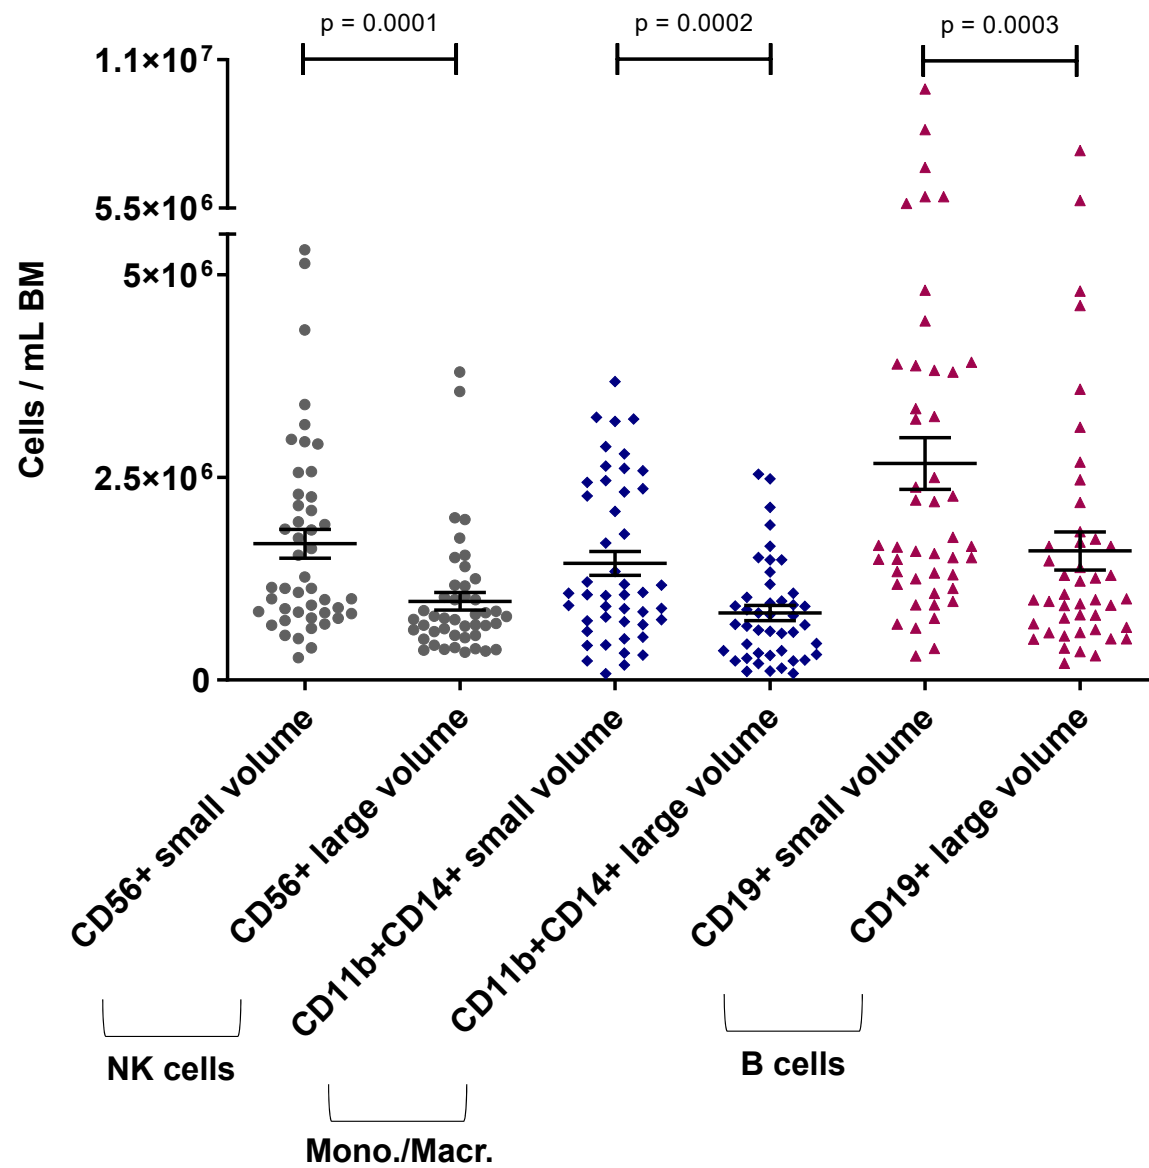

Additional file 1: Fig. S6

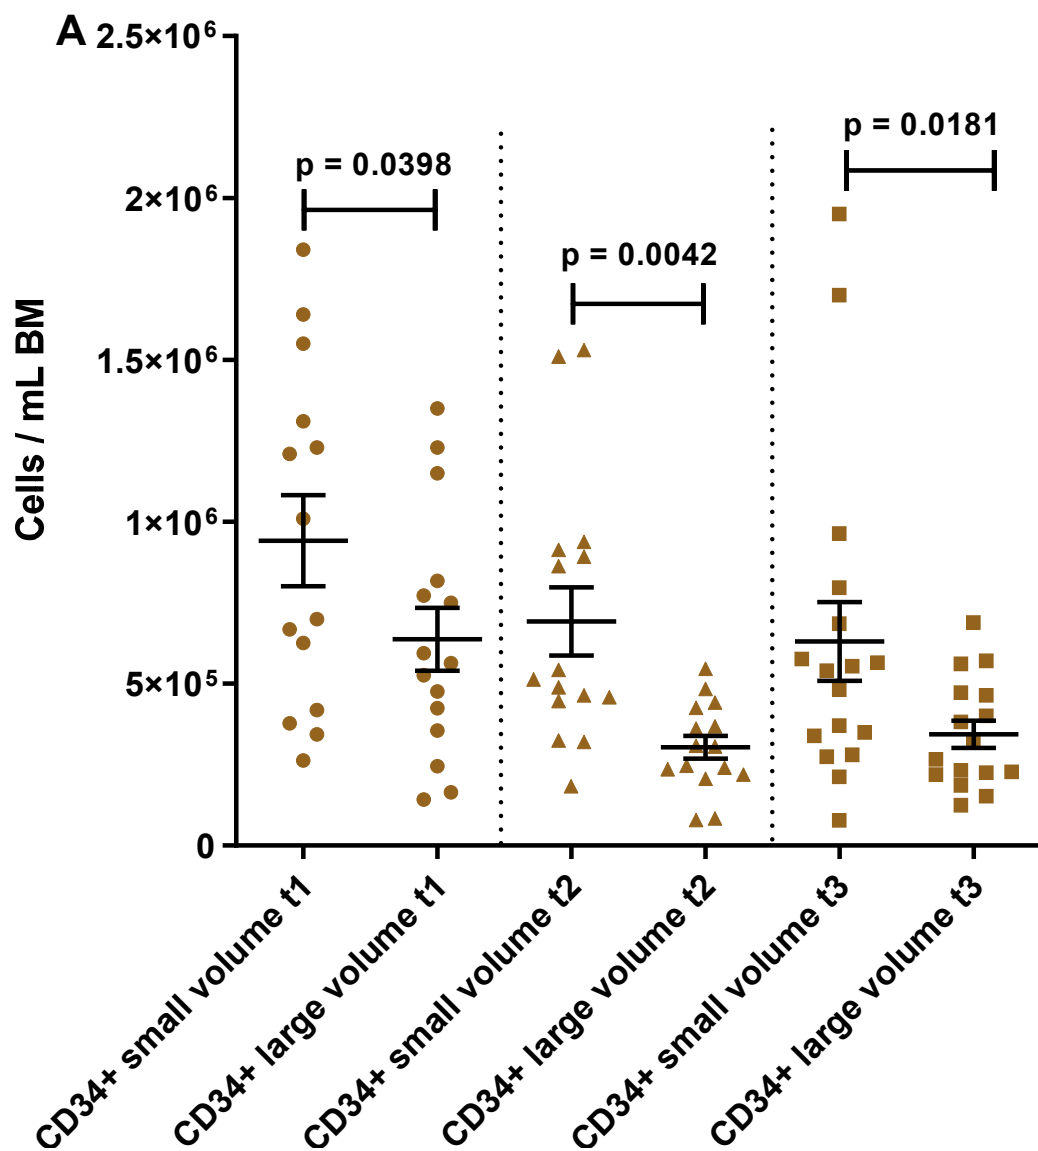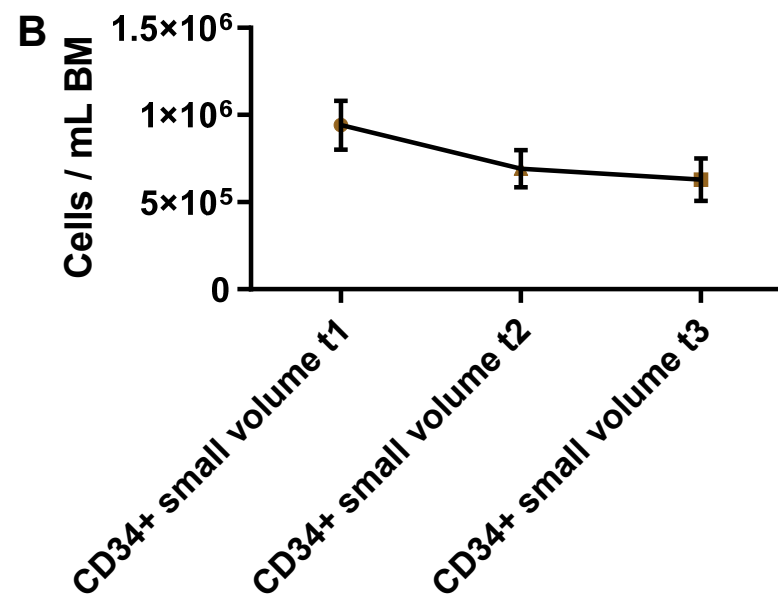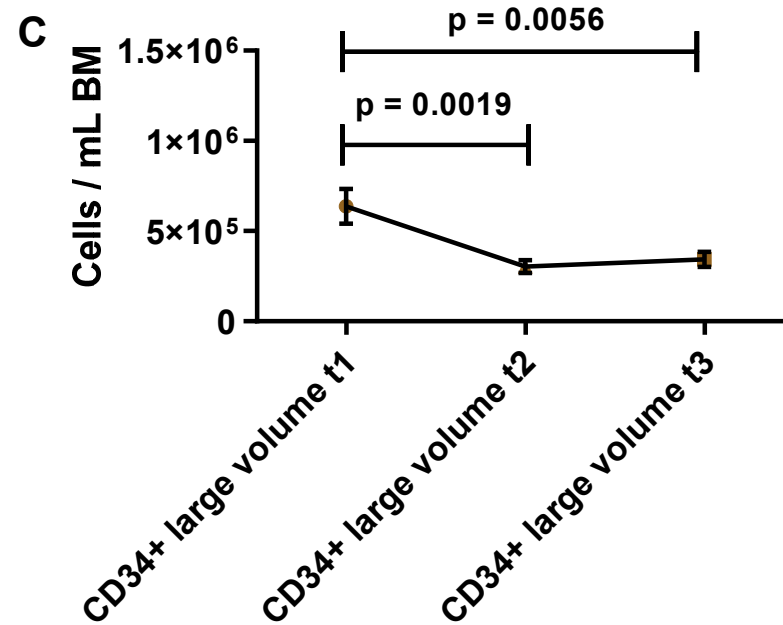

Additional file 1: Fig. S7

### CD45neg MSC subsets

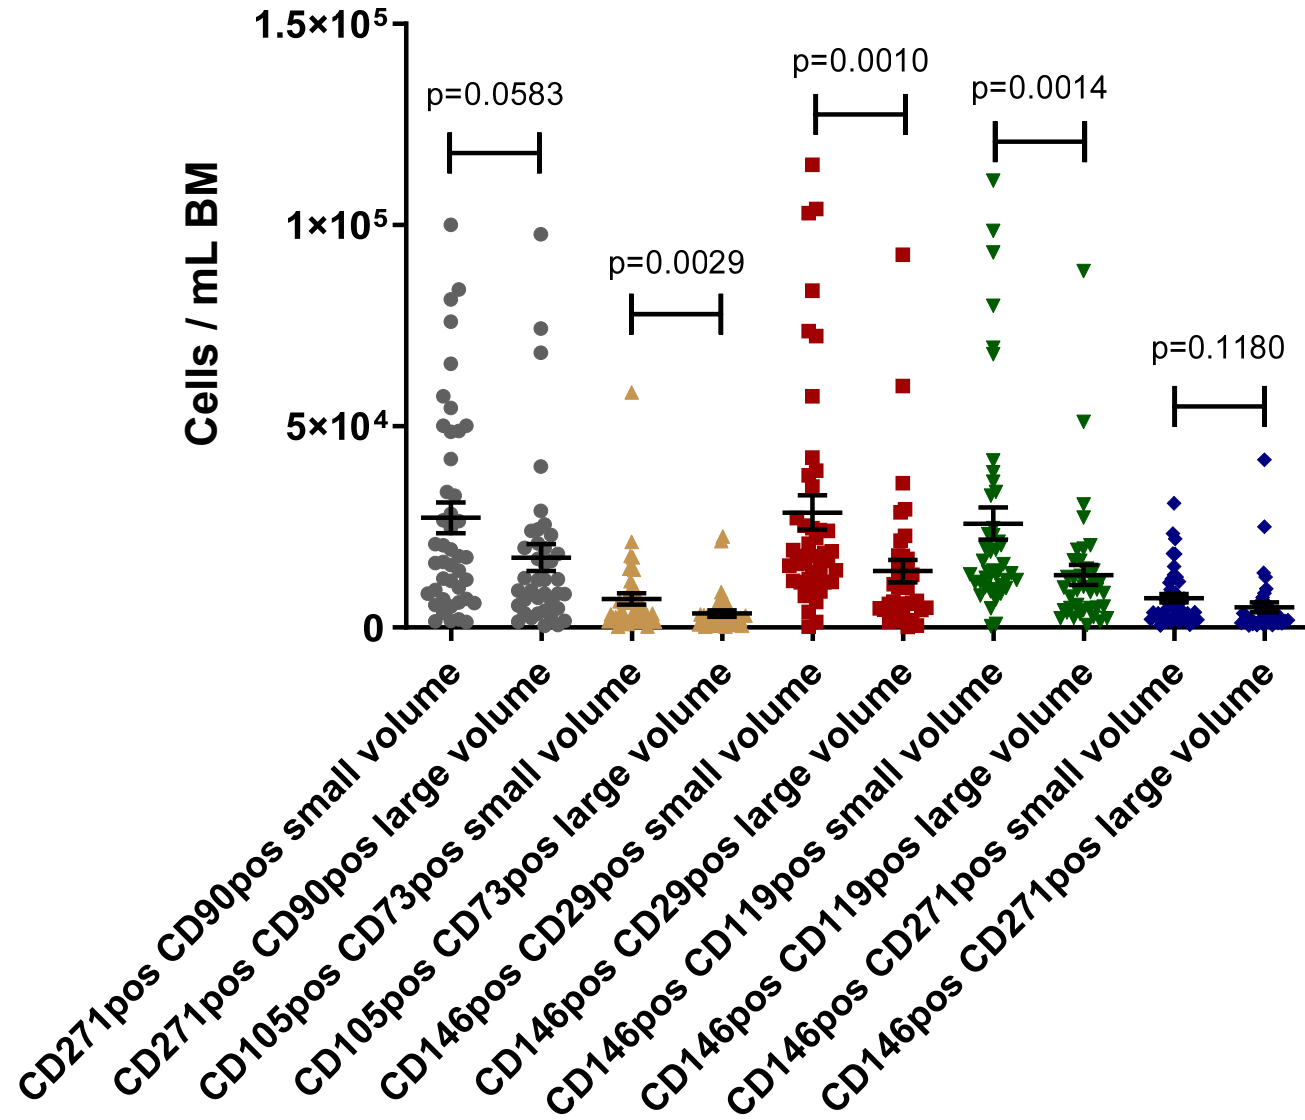

Additional file 1: Fig. S8

### CD45dim MSC subsets

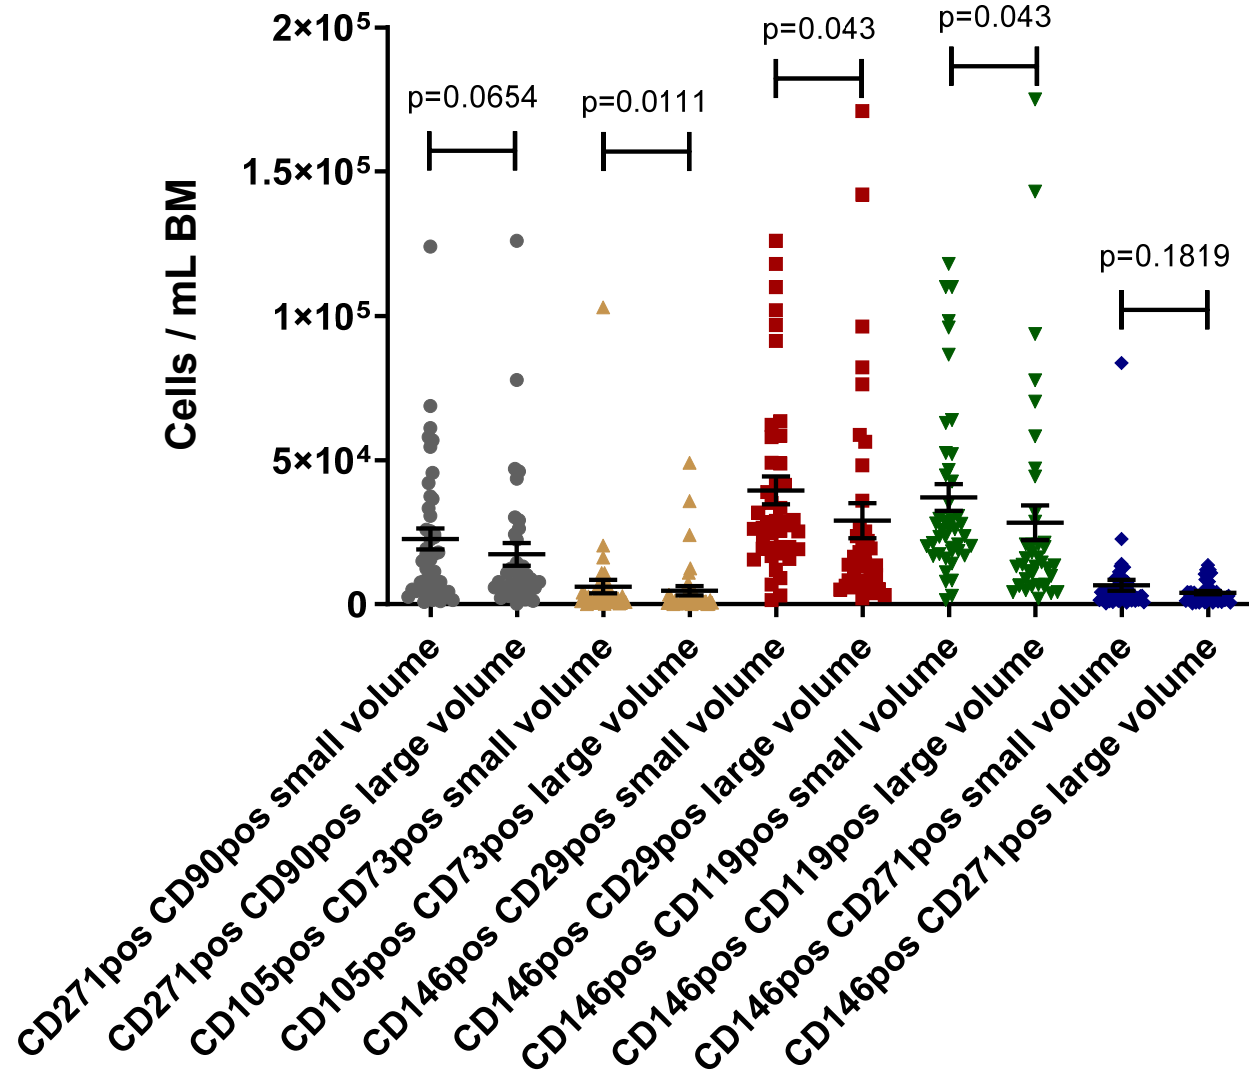



Additional file 1: Fig. S9

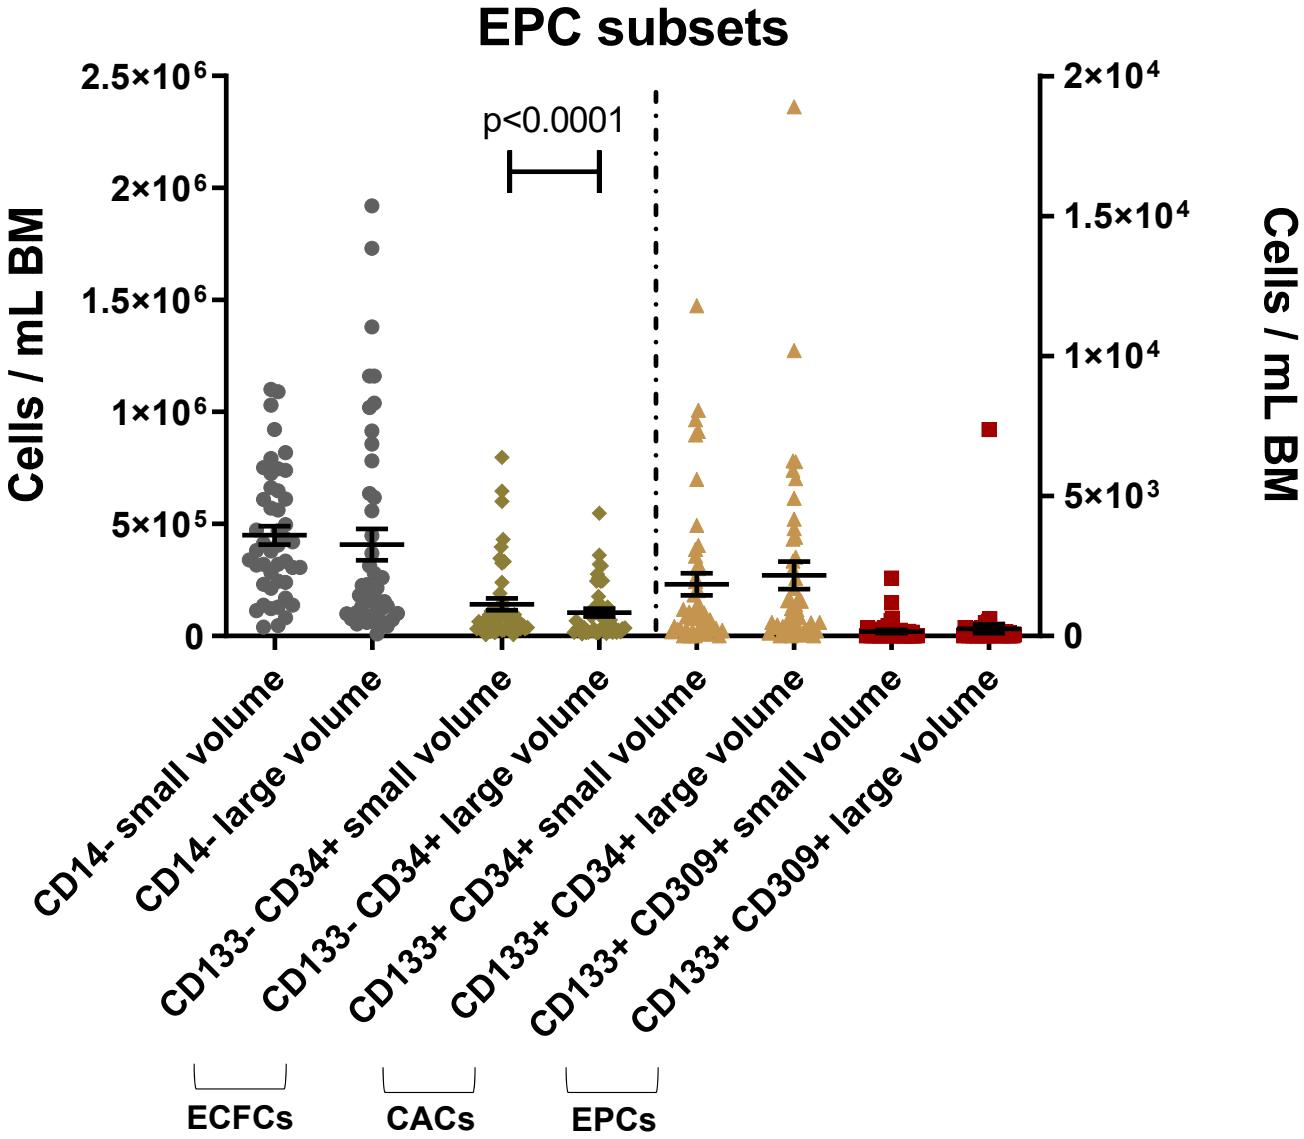

# Additional file 1: Fig. S10

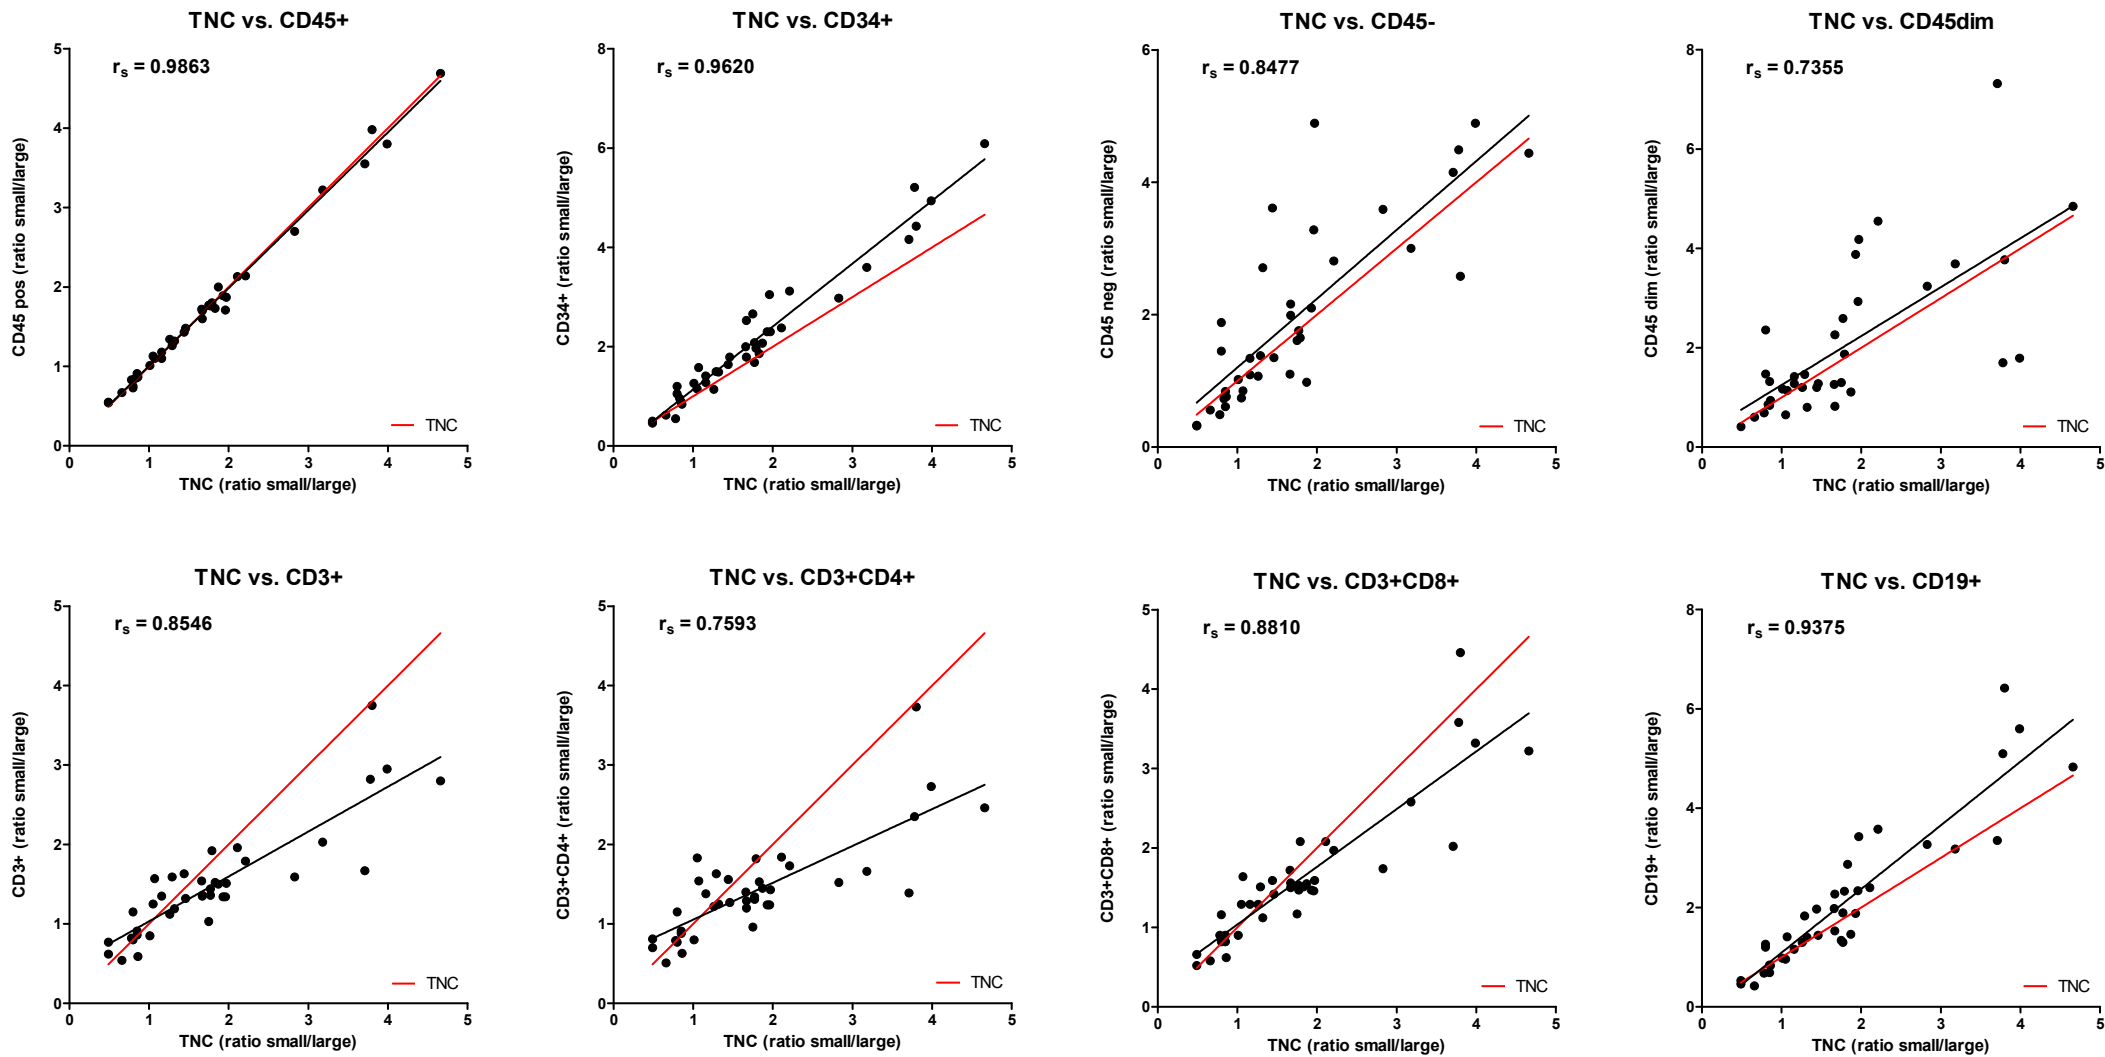

# Additional file 1: Fig. S10 (continued)

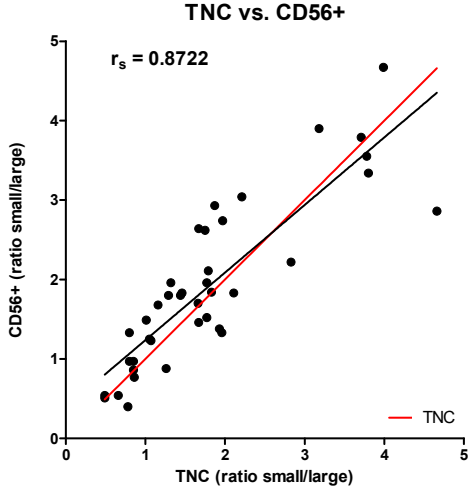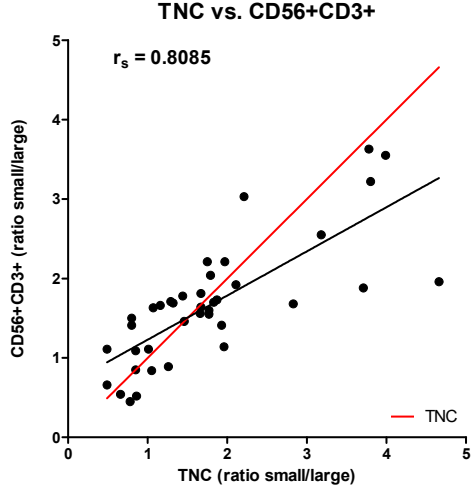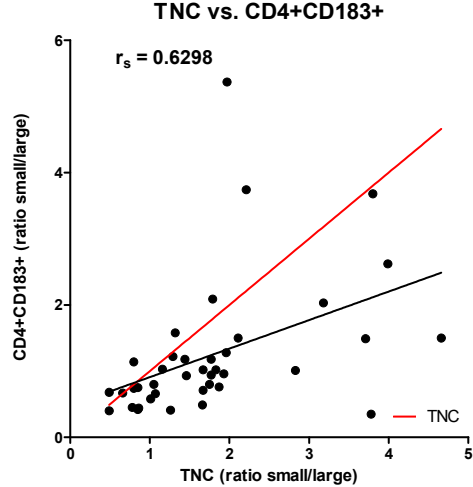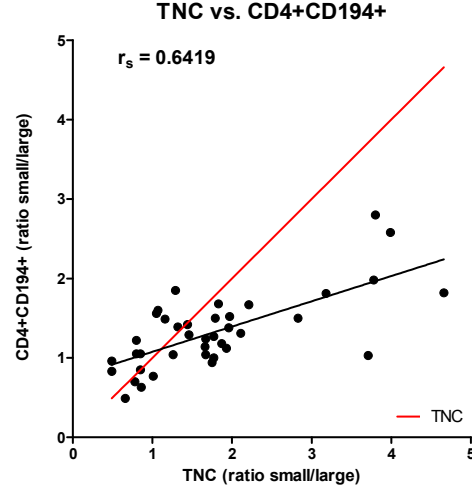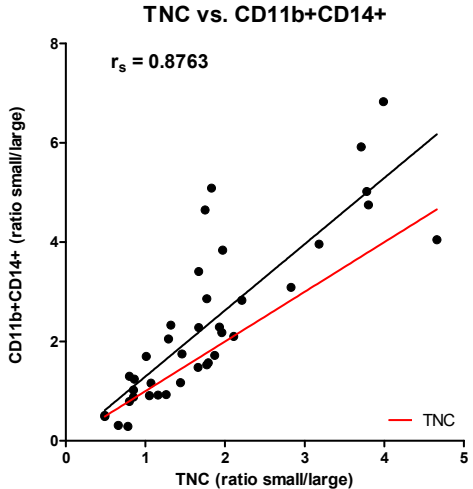

Additional file 1: Fig. S11

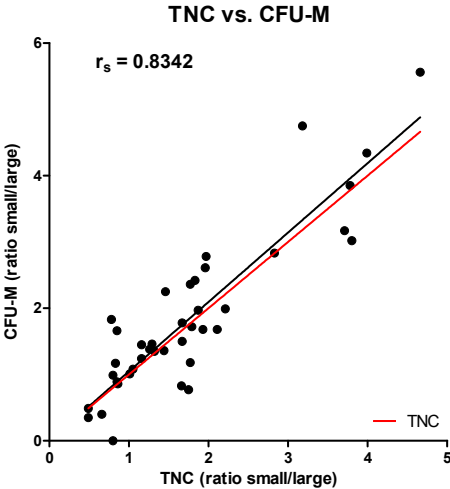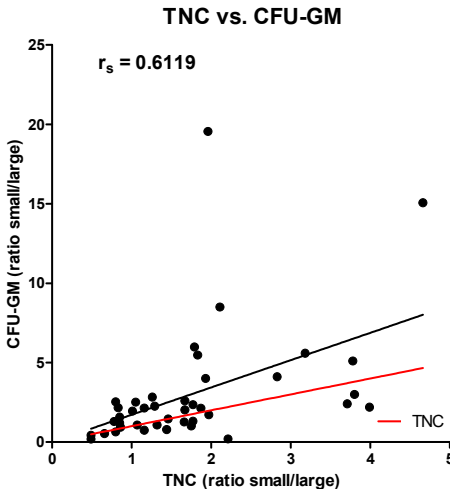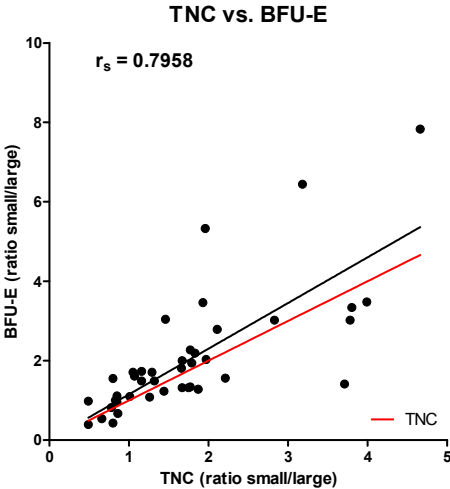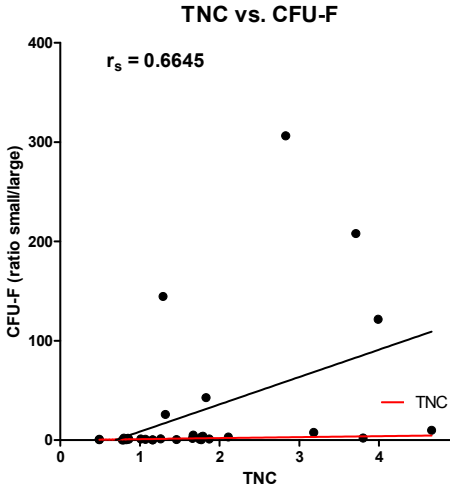

# Additional file 1: Fig. S12

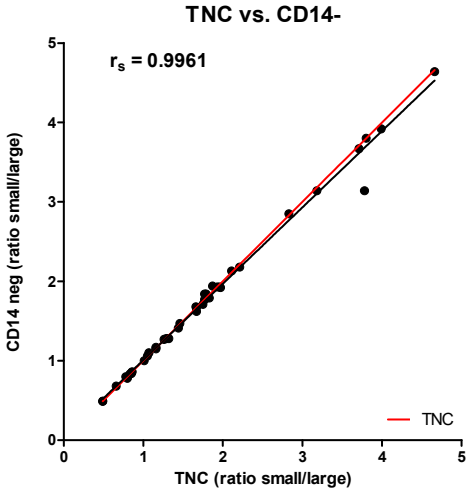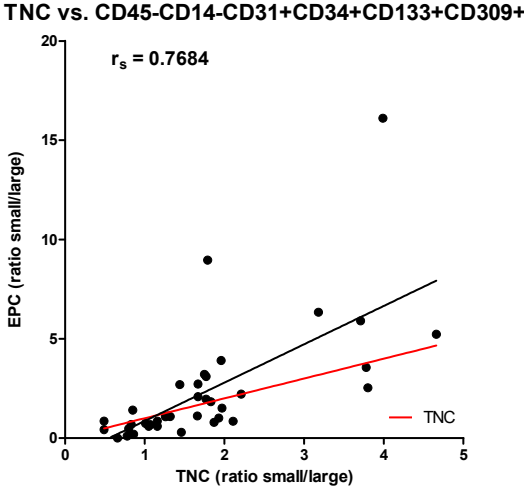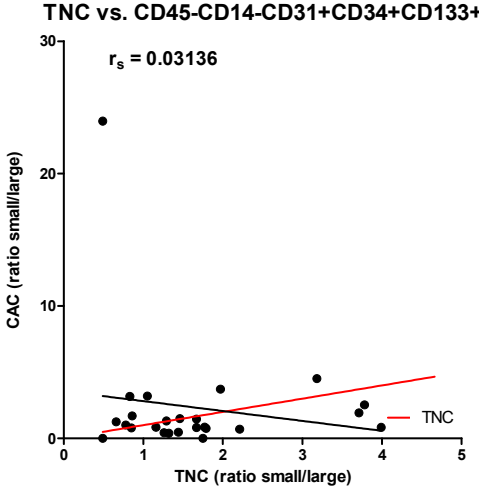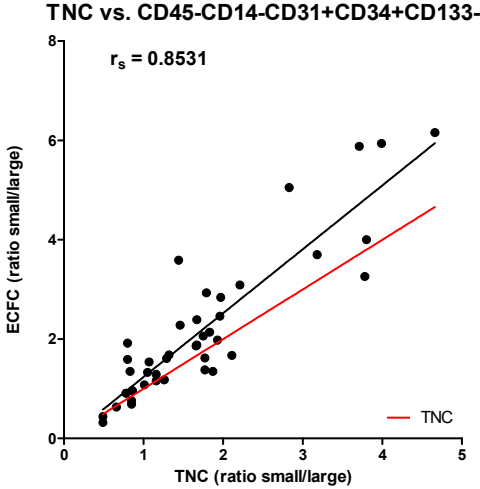

Supplement: MOESM1 [file 26060204]
